# Supplementary material for: Listening to your partner: serotonin increases male responsiveness to female vocal signals in mice
Source: Front Hum Neurosci. 2024 Jan 24;17:1304653. doi: 10.3389/fnhum.2023.1304653 (PMC10847236; doi:10.3389/fnhum.2023.1304653)
Supplement: Supplementary file 2 [file Table_2.XLSX]

## Sheet: systemic injection
Male	Treatment	Dominance	HarmonicUSVs	BaselineUSVs	USVsDuringPlayback	USVsRecovery		Digging1st5	Digging2nd5	Digging3rd5		Grooming1st5	Grooming2nd5	Grooming3rd5		mCircle1st5	mCircle2nd5	mCircle3rd5		fCircle1st5	fCircle2nd5	fCircle3rd5
M1	Saline	D	0	1	0	5		54.255	47.506	26.748		9.5	3.75	13.001		48.501	29.499	69.754		38.752	40.755	93.749
M2	Saline	S	40	359	77	229		43.996	26.768	20.502		1.254	0	13.75		80.516	112.494	92.026		22.018	59.46	31.996
M3	Saline	S	175	483	402	426		16.248	57.25	11.758		7.998	1	18		64.984	62.51	53.748		26.258	32.244	31.008
M4	Saline	D	687	639	608	691		56.772	49.236	51.772		5.5	1.25	13.258		59.24	74.932	103.742		40.744	69.954	60.002
M5	Saline	S	8	392	231	280		30.814	50.49	25		9.51	0	15.49		66.484	89.514	82.692		49.47	44.27	33.258
M6	Saline	D	1	122	65	96		19.616	43.065	2.496		6.499	13.745	23.151		118.006	66.517	75.066		49.496	27.553	24.747
M7	Saline	N	13	147	124	105		2.244	17.257	0		15.247	0.75	40.255		92.747	81.731	89.001		66.751	39.75	67.513
M8	Saline	N	73	292	109	304		45.493	45.5	7.248		1.754	27.296	19.501		41.249	51.986	124.741		28.264	42.502	60.738
M9	Saline	S	121	124	70	173		55.005	106.499	19.504		4.5	5.496	5.502		30.001	26.998	106.997		61.48	37.991	63.515
M10	Saline	D	187	181	132	118		37.507	56.496	2.002		0.5	3	27.503		112.996	101.738	110.012		44.005	59.5	25.501
M11	Saline	D	271	666	747	638		54.009	52.484	10.497		7.012	2.002	12.513		48.005	32	165.509		39.51	32.005	108.002
M12	Saline	S	13	485	69	75		21.486	67.256	38.998		0.75	27.506	3.5		76.964	44.244	110.272		77.234	70.756	67.262
M13	5HTP	S	0	6	1	4
M14	5HTP	D	0	3	1	1		2.97	7.002	19.302		13.494	17.242	29.762		69.78	42.012	41.004		43.44	44.518	14.746
M15	5HTP	D	32	439	18	463		46.24	28.76	23.51		17.002	22.742	3.502		52.234	22.244	12.006		36.996	29.744	9.756
M16	5HTP	S	1	40	3	26		29.732	78.262	47.984		16.006	1.002	26.738		58.472	15.992	40.004		46.028	14.988	26.99
M17	5HTP	D	16	197	135	328		39.24	78.736	53.25		11	0	37.004		73.5	45.008	47.758		42.25	50.21	30.502
M18	5HTP	S	3	198	22	292		25.512	71.982	29.724		0	13.004	12.742		52.51	25	48.302		52.752	35.994	12.798
M19	5HTP	D	0	44	1	31		19.76	134.536	86.004		34.498	7.746	60.742		53.214	8.498	17.76		36.732	14.506	36.238
M20	5HTP	S	7	275	52	194		13.014	57.994	18.49		14	4.742	8.992		75.188	44.23	72.006		47.018	28.764	45.22
M21	5HTP	S	8	80	10	85		25.994	77.236	69.994		8.246	5.246	19.24		68.066	17.254	25.972		53.21	15.994	16.752
M22	5HTP	D	3	298	4	188		25.994	36.978	11.74		12.502	0	19.736		63.244	34.404	32.252		45.764	16.26	25.262
M23	5HTP	D	0	6	6	8		27.478	27.5	41.98		4.992	23.746	34.006		54.566	8.01	34.49		41.238	13.01	25.246
M24	5HTP	S	69	449	15	56		48.5	60.001	46.25		0	8.999	13.494		72.478	55.517	73.49		55.754	38.241	51.749
M25	pCPA	D	0	5	6	3		37.504	51.744	17		5.498	3.494	6.002		60.748	14.5	9.244		44.534	23.738	17.752
M26	pCPA	S	0	2	0	6		33.244	57.21	78.278		10.998	2.458	10.144		26.504	18.51	20.992		30.836	27.004	16.518
M27	pCPA	N	0	10	10	14		13.486	55.734	35.752		0	4.998	25.98		35.76	47.742	46.772		53.25	65.25	50.518
M28	pCPA	N	4	7	2	18		18.742	37.466	14.012		9.01	0	9.25		43.492	33.776	75.246		33.734	38.748	39.504
M29	pCPA	D	24	322	15	242		34.004	26.248	18.49		4.5	11.504	17.242		83.504	35.498	24.264		58.49	32.004	39.02
M30	pCPA	S	1	70	2	2		40.49	12.728	37.994		0	8	4.5		53.014	9.244	59.016		31.22	10.256	50.758
M31	pCPA	S	6	343	39	242		22.246	78.512	48.248		7.002	0	8.992		73.008	50.752	95.514		52.024	47.986	46.254
M32	pCPA	D	0	3	0	8		17.504	22.226	1		15.502	35.506	67.758		47.51	44.518	22.756		41.766	6.25	32.73
M33	pCPA	S	18	361	7	46		25.248	5	36.762		0.999	7.248	8.254		48.503	63.031	17.998		67.523	84.985	88.25
M34	pCPA	D	3	118	10	13		23.738	38.004	92.488		8.242	6.578	9.494		46.498	27.518	15.504		31.266	26.95	18.272
M35	pCPA	D	34	78	107	165		6.24	62.756	21.748		11.998	0.748	10.004		44.742	41.246	40.01		14.242	11.738	13
M36	pCPA	S	0	3	4	2		28.502	69.75	70.756		5.752	12.75	9.25		54.262	24.496	16.006		47.498	38.742	23.752

## Sheet: local infusion
Male	Treatment	HarmonicUSVs	BaselineUSVs	USVsDuringPlayback	USVsRecovery		Digging1st5	Digging2nd5	Digging3rd5		Grooming1st5	Grooming2nd5	Grooming3rd5		mCircle1st5	mCircle2nd5	mCircle3rd5		fCircle1st5	fCircle2nd5	fCircle3rd5
M1	aCSF	776	774	561	864		16.783	45.917	26.058		0	10.049	0		81.784	27.594	26.998		70.955	64.48	31.076
M3	aCSF	55	424	142	245		20.631	57.772	22.714		15.714	9.118	37.807		32.458	15.713	1.864		28.449	48.151	16.229
M19	aCSF	315	527	491	520		9.548	32.28	7.806		1.76	0	43.252		54.547	41.975	79.254		63.395	89.498	89.218
M20	aCSF	124	594	532	551		27.777	43.521	16.267		8.519	1.253	47.022		53.748	37.574	23.073		101.034	74.092	34.366
M21	aCSF	199	774	825	618		25.109	64.217	26.505		8.999	7.757	100.123		67.299	39.073	48		51.052	46.785	82.394
M22	aCSF	195	266	243	227		53.07	20.511	11.5		7.257	22.279	65.557		0	50.057	18.057		30.314	51.568	18.057
M23	aCSF	61	488	390	511		34.28	18.808	54.352		10.791	9.007	9.756		77.038	71.817	44.003		102.799	93.084	84.425
M4	aCSF	87	655	596	582		25.061	38.513	27.259		10.504	25.519	20.517		75.692	45.555	13.528		75.069	56.952	12.063
M37	aCSF	38	379	168	296		42.25	74.722	20.48		25.256	92.492	40.75		31.254	21	32.744		18	45.99	73.484
M38	aCSF	92	755	607	296		64.502	56.502	51.74		6	25.752	64.242		21.512	25.75	14.244		30.25	25.984	11.998
M39	aCSF	16	398	169	306		55.002	59.53	48.516		8.262	10.5	67.766		34.258	50.482	21.768		34.004	66.522	60.492
M40	aCSF	542	719	406	544		33.496	17.982	29.016		14.754	6.004	33.004		54.722	56.034	44.792		58.776	48.514	106.046
M41	aCSF	280	733	373	542		78.234	56.84	30.234		23.992	43.25	117.03		39.506	21.498	11.71		34.52	24.724	39.238
M42	aCSF	151	920	572	657		18.494	51.76	17.88		7.256	75.58	94.764		71.298	46.262	58.26		74.504	66.768	120.726
M43	aCSF	15	595	83	279		82.53	126.734	53.268		22.504	27.978	81.264		37.506	27.23	26.756		40.224	44.246	42.038
M24	Fenfluramine	67	709	265	631
M26	Fenfluramine	82	582	61	62
M29	Fenfluramine	55	554	89	42
M30	Fenfluramine	66	538	68	110
M31	Fenfluramine	613	835	610	77		23.262	36.77	10.746		9.75	16.508	49.254		40.252	24.748	74.488		23.99	33	25.76
M32	Fenfluramine	373	825	610	731		35.996	28.242	19.024		2.002	0	26.726		75.502	63.032	124.98		64.754	67.998	121.492
M33	Fenfluramine	186	364	133	218		50.018	14	22.498		0	18.506	19.74		66.504	148.264	163.502		54.512	93.742	107.76
M35	Fenfluramine	164	866	519	709		54.242	43.986	23.498		9.742	0.75	32.746		42.492	38.992	45.73		27.254	26.998	58.506
M36	Fenfluramine	111	359	156	296		41.246	48.99	28.242		14.24	5.496	14.514		22.262	0	11.508		18.242	16.248	9.5
M13	Fenfluramine	79	361	148	175		36.002	36.25	25.508		21.75	24.752	31.014		86	39.258	52.504		29.74	11.752	25.484
M14	Fenfluramine	16	153	39	414		58.748	90.49	47.26		3.004	13.748	44.498		55.756	33.742	42.234		43.024	19.262	26.506
M16	Fenfluramine	0	55	39	116		14.258	38.748	50.502		7.744	15.258	54.988		56.49	55.518	37.748		61.498	67.992	48.26
M17	Fenfluramine	18	165	9	83		27.006	71.252	15.244		48	11.756	155.25		24.5	33.504	13.998		17.492	31.254	52.748
M18	Fenfluramine	3	23	1	10		8.754	74	19.512		4.498	18.248	67.5		42.764	21.244	53.746		23.248	31.49	65.224
